# Supplementary material for: Digital Assessment Tools Using Animation Features to Quantify Alcohol Consumption: Systematic App Store and Literature Review
Source: PubMed Central journal article supplement (PMC8987963; doi:10.2196/28927), 2022-03-23
Supplement: jmir_v24i3e28927_app2.pdf [file jmir_v24i3e28927_app2.pdf]

Appendix 2a – Mobile digital assessment tools quantifying alcohol consumption (alcohol DATs) in English language: Characteristics of the included tools (n= 19).

| Main feature                                         | Name<br>(year of last update <sup>a</sup> , country)                          | Icon                                                                                | Publishing institution<br>(type)                                    | Operating system | Times downloaded<br>from Google Play | Target group                        | Mentions scientific<br>background | Choose drinks from<br>visual selection | Choose vessels from<br>visual selection | Virtually pour drinks | Adjust drink<br>characteristics<br>(non-visually) | User feedback                       |                                                         | Extra features                                                                              |
|------------------------------------------------------|-------------------------------------------------------------------------------|-------------------------------------------------------------------------------------|---------------------------------------------------------------------|------------------|--------------------------------------|-------------------------------------|-----------------------------------|----------------------------------------|-----------------------------------------|-----------------------|---------------------------------------------------|-------------------------------------|---------------------------------------------------------|---------------------------------------------------------------------------------------------|
|                                                      |                                                                               |                                                                                     |                                                                     |                  |                                      |                                     |                                   |                                        |                                         |                       |                                                   | Unit of<br>consumption <sup>b</sup> | Additional feedback                                     |                                                                                             |
| One-time assessment<br>of risky drinking             | <b>Drinks Meter</b><br>(2020, United Kingdom) <sup>55</sup>                   |    | Global Drug Survey<br>- GDS<br>(private company)                    | Both             | 10 000+                              | A                                   | N                                 | Y                                      | Y                                       | N                     | Y                                                 | SD                                  | Physiology/ nutrition<br>(calories)                     | Text-based<br>AUDIT; 'drink<br>pouwer' tool                                                 |
|                                                      | <b>Know Your<br/>Numbers</b><br>(2017, United Kingdom) <sup>52</sup>          |    | Wessex Academic<br>Health Science<br>Network<br>(public actor)      | Both             | 500+                                 | Health<br>care<br>profes<br>sionals | Y                                 | Y                                      | Y                                       | N                     | N                                                 | SD                                  |                                                         | Alcohol unit<br>guide                                                                       |
|                                                      | <b>Know Your Units</b><br>(2017, United Kingdom) <sup>54</sup>                |    | Alcohol And You<br>Northern Ireland<br>(public actor)               | Both             | 500+                                 | A                                   | N                                 | Y                                      | N                                       | N                     | N                                                 | Y                                   | SD                                                      | Physiology/ nutrition<br>(calories)                                                         |
| Individualized program to<br>reduce or quit drinking | <b>MeSelfControl</b><br>(2016,<br>Germany) <sup>60</sup>                      |    | appPeople<br>(no information)                                       | Both             | 1000+                                | A                                   | Y                                 | Y                                      | Y                                       | N                     | Y                                                 | Alcohol<br>quantity                 |                                                         |                                                                                             |
|                                                      | <b>ReduceYour<br/>Drinking</b><br>(2015,<br>Denmark) <sup>47</sup>            |    | H. Lundbeck A/S<br>(private company -<br>pharmaceutics)             | iOS              | n/a                                  | A                                   | N                                 | Y                                      | N                                       | N                     | N                                                 | Alcohol<br>quantity                 |                                                         | Text-based DAT<br><br>Available in<br>Russian                                               |
|                                                      | <b>Saying When</b><br>(2016, Canada) <sup>59</sup>                            |    | CAMH/Centre for<br>Addiction and<br>Mental Health<br>(public actor) | Both             | 5000+                                | A                                   | Y                                 | Y                                      | Y                                       | Y                     | N                                                 | SD                                  | Positive effect<br>(money saved; sober<br>days)         | Explanation of<br>SD concept                                                                |
| BAC calculator                                       | <b>alcCalc</b><br>(2014, Japan) <sup>51</sup>                                 |   | NOHT CO., LTD.<br>(private company)                                 | iOS              | n/a                                  | A                                   | N                                 | Y                                      | N                                       | N                     | N                                                 | Alcohol<br>quantity                 | Physiology/nutrition<br>(calories; time until<br>sober) |                                                                                             |
|                                                      | <b>Alcohol Diary</b><br>(2019, not<br>provided) <sup>63</sup>                 |  | James Porter<br>(no information)                                    | iOS              | n/a                                  | A                                   | N                                 | Y                                      | N                                       | N                     | N                                                 | SD                                  |                                                         |                                                                                             |
|                                                      | <b>Alcohol meter</b><br>(2019, not<br>provided) <sup>61</sup>                 |  | J. Alcaraz<br>(no information)                                      | Android          | 5000+                                | A                                   | N                                 | N                                      | N                                       | Y                     | Y                                                 | Alcohol<br>quantity                 | Physiology/nutrition<br>(time until sober)              |                                                                                             |
|                                                      | <b>DrinkWatch Unit<br/>Checker</b><br>(2016, United<br>Kingdom) <sup>65</sup> |  | Henry McCrory<br>(registered charity<br>UK)                         | iOS              | n/a                                  | A                                   | N                                 | Y                                      |                                         |                       |                                                   | Y                                   | SD                                                      | Physiology/nutrition<br>(calories; time until<br>sober)<br>negative effect<br>(money spent) |

Appendix 2a – Mobile digital assessment tools quantifying alcohol consumption (alcohol DATs) in English language: Characteristics of the included tools (n= 19). (continued)

| Main feature   | Name<br>(year of last update <sup>a</sup> , country)                              | Icon                                                                                | Publishing institution<br>(type)                               | Operating system | Times downloaded<br>from Google Play | Target group | Mentions scientific<br>background | Choose drinks from<br>visual selection | Choose vessels from<br>visual selection | Virtually pour drinks | Adjust drink<br>characteristics<br>(non-visually) | User feedback                       |                                                                                                                 | Extra features                                                           |
|----------------|-----------------------------------------------------------------------------------|-------------------------------------------------------------------------------------|----------------------------------------------------------------|------------------|--------------------------------------|--------------|-----------------------------------|----------------------------------------|-----------------------------------------|-----------------------|---------------------------------------------------|-------------------------------------|-----------------------------------------------------------------------------------------------------------------|--------------------------------------------------------------------------|
|                |                                                                                   |                                                                                     |                                                                |                  |                                      |              |                                   |                                        |                                         |                       |                                                   | Unit of<br>consumption <sup>b</sup> | Additional feedback                                                                                             |                                                                          |
| Drinking diary | <b>AlcoExpert</b><br>(2019, Russia) <sup>48</sup>                                 |    | Grey Media<br>(private company)                                | Android          | 1000+                                | A            | N                                 | Y                                      | N                                       | N                     | Y                                                 | Alcohol<br>quantity                 | Physiology/nutrition<br>(equivalent in volume<br>of beer/vodka)<br><br>negative effect<br>(heavy drinking days) | Photorealistic<br>drink images<br><br>Available in<br>Russian            |
|                | <b>Alcofy</b><br>(2020, not<br>provided) <sup>64</sup>                            |    | JMJ Dev<br>(no information)                                    | Android          | 5000+                                | A            | N                                 | Y                                      | Y                                       | N                     | Y                                                 | Alcohol<br>quantity                 | Physiology/nutrition<br>(Time until sober;<br>typical symptoms at<br>intoxication level)                        |                                                                          |
|                | <b>DrinkCoach</b><br>(2020, United<br>Kingdom) <sup>57</sup>                      |    | Humankind<br>(registered charity<br>UK)                        | Both             | 5000+                                | A            | N                                 | Y                                      | N                                       | N                     | Y                                                 | SD                                  | Physiology/nutrition<br>(calories)<br><br>positive effect<br>(sober days)                                       | Visualized<br>drinking scene;<br>link to<br>animation-<br>enhanced AUDIT |
|                | <b>DrinkControl</b><br>(2020, not<br>provided) <sup>62</sup>                      |    | E-protect<br>(no information)                                  | iOS              | n/a                                  | A            | N                                 | Y                                      | N                                       | N                     | Y                                                 | SD                                  | Negative effect<br>(money spent)                                                                                | Photorealistic<br>drink images                                           |
|                | <b>Dry Days</b><br>(2020, United<br>Kingdom) <sup>56</sup>                        |    | AlcoChange<br>(private company)                                | Both             | 10 000+                              | A            | N                                 | Y                                      | Y                                       | N                     | Y                                                 | SD                                  | Positive effect<br>(money saved; sober<br>days)                                                                 |                                                                          |
|                | <b>Drynk</b><br>(2020, Ireland) <sup>50</sup>                                     |   | Syzible<br>(no information)                                    | Android          | 100+                                 | A            | N                                 |                                        |                                         |                       |                                                   | SD                                  |                                                                                                                 | BAC calculator                                                           |
|                | <b>Simple Alcohol<br/>Unit Tracker</b><br>(2020, United<br>Kingdom) <sup>58</sup> |  | DeveloperJam<br>(no information)                               | Android          | 10 000+                              | A            | N                                 | Y                                      | N                                       | N                     | N                                                 | SD                                  | Negative effect<br>(drinking days per<br>week)                                                                  |                                                                          |
|                | <b>TRY DRY</b><br>(2020, United<br>Kingdom) <sup>53</sup>                         |  | Alcohol Change UK<br>(registered charity<br>UK)                | Both             | 50 000+                              | A            | N                                 | Y                                      | Y                                       | N                     | Y                                                 | SD                                  | Physiology/nutrition<br>(calories)<br><br>positive effect<br>( money saved; sober<br>days)                      | AUDIT-C                                                                  |
| SD<br>counter  | <b>Wise Drinking</b><br>(2019, France) <sup>49</sup>                              |  | Pernod Ricard<br>(private company -<br>alcoholic<br>beverages) | Both             | 50 000+                              | A            | N                                 | Y                                      | Y                                       | N                     | Y                                                 | SD                                  | Physiology/nutrition<br>(calories)                                                                              | Available in<br>Russian                                                  |

A adult general population. AUDIT Alcohol Use Disorder Identification Test. BAC blood alcohol concentration. DAT digital assessment tool. [g] grams. SD standard drinks.

<sup>a</sup>At time of data extraction (2020) <sup>b</sup>SD = standard drinks. **Alcohol quantity** = pure ethanol consumed (e.g. in grams or liters).

Appendix 2b – Web-based digital assessment tools quantifying alcohol consumption (alcohol DATs) in English language: Characteristics of the included tools (n= 3).

| Main feature                          | Tool name<br>(year of last update <sup>a</sup> )     | URL                                                                                                                                               | Responsible organization (country)                            | Target group | Choose drinks from visual | Choose vessels from visual | Virtually pour drinks | Adjust drink characteristics | User feedback                    |                                                                                                       | Comments                                                      |
|---------------------------------------|------------------------------------------------------|---------------------------------------------------------------------------------------------------------------------------------------------------|---------------------------------------------------------------|--------------|---------------------------|----------------------------|-----------------------|------------------------------|----------------------------------|-------------------------------------------------------------------------------------------------------|---------------------------------------------------------------|
|                                       |                                                      |                                                                                                                                                   |                                                               |              |                           |                            |                       |                              | Unit of consumption <sup>e</sup> | Additional feedback <sup>f</sup>                                                                      |                                                               |
| SD counter                            | Drinkaware Drinks Calculator (2020) <sup>68</sup>    | <a href="https://www.drinkaware.ie/tools-resources/drinks-calculator">https://www.drinkaware.ie/tools-resources/drinks-calculator</a>             | Alcohol Awareness Foundation Ireland T/A Drinkaware (Ireland) | A            | Y                         | N                          | N                     | N                            | SD                               | Physiology/nutrition (calories; ingested sugar; hours to process)<br><br>negative effect (total cost) | Drink selection depends on chosen drinking context (home/pub) |
| One-time assessment of risky drinking | DrinkCoach Alcohol Test (not provided) <sup>69</sup> | <a href="https://drinkcoach.org.uk/alcohol-test">https://drinkcoach.org.uk/alcohol-test</a>                                                       | Humankind - registered charity (UK)                           | A            | Y                         | Y                          | N                     | N                            | SD<br><br>AUDIT risk score       | Physiology/nutrition (calories)                                                                       | Visually enhanced AUDIT; linked to the DrinkCoach mobile tool |
|                                       | HSE Self assessment tool (2019) <sup>67</sup>        | <a href="https://www2.hse.ie/wellbeing/alcohol/self-assessment-tool/#Start">https://www2.hse.ie/wellbeing/alcohol/self-assessment-tool/#Start</a> | Health Service Executive – HSE (Ireland)                      | A            | Y                         | N                          | N                     | N                            | SD<br><br>AUDIT risk score       | Physiology/nutrition (calories; ‘burger equivalent’; exercise time to burn calories)                  | Visually enhanced AUDIT                                       |

A adult general population. AUDIT Alcohol Use Disorder Identification Test. BAC blood alcohol concentration. DAT digital assessment tool. [g] grams. SD standard drinks.

<sup>a</sup>At time of data extraction (2020) <sup>b</sup>SD = standard drinks. **Alcohol quantity** = pure ethanol consumed (e.g. in grams or liters). **AUDIT risk score**.
